# Supplementary material
Source: Springer Nature journal article supplement (https://www.springermedizin.de/resource/supplementary/13012_2012_597_MOESM2_ESM.pdf/9630346)

Inputs

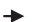

Functions

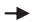

Proximal outcomes

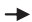

Intermediate outcomes

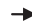

Distal outcomes for Agency

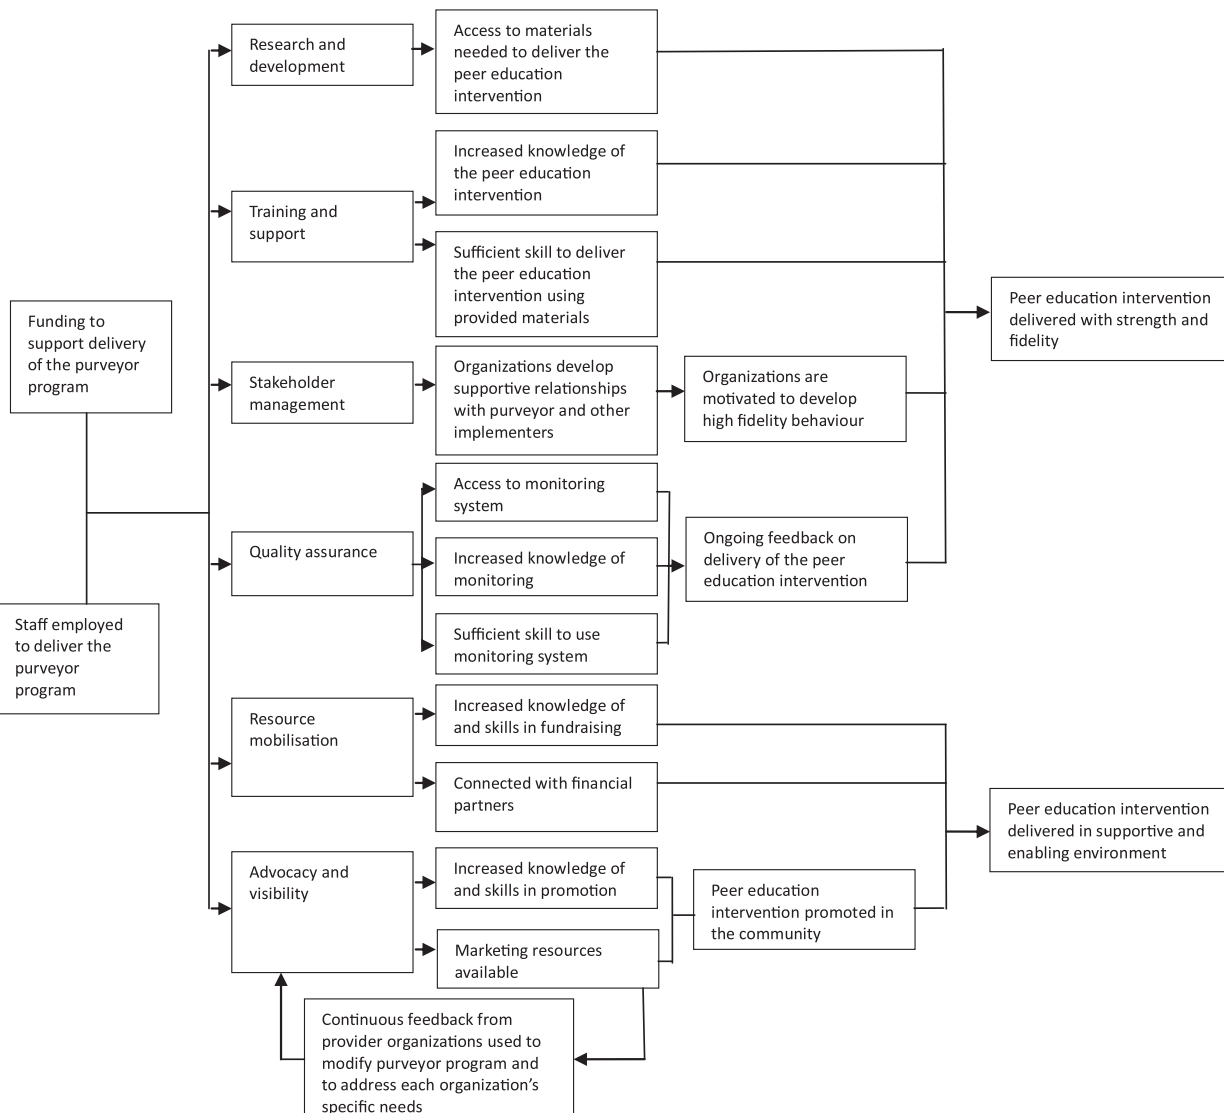

Supplement: MOESM2 [file 9630346]
